# Supplementary material for: New idtracker.ai rethinks multi-animal tracking as a representation learning problem to increase accuracy and reduce tracking time
Source: eLife. 2026 Apr 15;14:RP107602. doi: 10.7554/eLife.107602 (PMC13082788; doi:10.7554/eLife.107602)
Supplement: Figure 1—source data 1. [file elife-107602-fig1-data1.xlsx]

## Sheet: idtracker.ai version 4
Name	IDF1 score without crossings (%)			IDF1 score with crossings (%)			Tracking time
	Median	Mean	20-80 percentiles	Median	Mean	20-80 percentiles	Median	Mean	20-80 percentiles
drosophila_6	99.735	99.272	98.797 - 99.735	99.649	99.218	98.776 - 99.649	0:21:39	0:22:26	0:21:39 - 0:23:15
drosophila_8	99.100	98.829	98.545 - 99.100	98.779	98.503	98.214 - 98.779	0:44:47	0:48:31	0:21:58 - 1:07:37
drosophila_10	99.006	99.006	one point only	99.007	99.007	one point only	6:28:35	6:28:31	6:18:53 - 6:38:12
drosophila_38	99.842	99.875	99.842 - 99.909	99.756	99.798	99.756 - 99.842	6:55:15	6:13:43	4:16:03 - 7:23:33
drosophila_59	99.737	99.737	99.737 - 99.737	99.707	99.707	99.707 - 99.707	1 day, 3h	1 day, 3h	9:41:00 - 1 day, 13h
drosophila_60	99.957	99.957	one point only	99.924	99.924	one point only	4 days, 18h	4 days, 18h	4 days, 15h - 4 days, 21h
drosophila_72	99.974	99.982	99.974 - 99.990	99.967	99.973	99.967 - 99.979	11:29:47	12:57:41	7:00:26 - 16:42:43
drosophila_80	99.628	99.628	one point only	99.558	99.558	one point only	6 days, 15h	6 days, 15h	6 days, 15h - 6 days, 16h
drosophila_100_1	98.268	98.268	one point only	98.108	98.108	one point only	8 days, 1h	8 days, 1h	8 days, 1h - 8 days, 2h
drosophila_100_2	97.606	97.606	one point only	97.583	97.583	one point only	9 days, 22h	9 days, 22h	9 days, 21h - 9 days, 22h
drosophila_100_3	69.658	69.658	one point only	69.432	69.432	one point only	13 days, 14h	13 days, 14h	13 days, 13h - 13 days, 15h
mice_2_1	99.170	99.227	99.170 - 99.285	97.364	97.726	97.364 - 98.088	0:05:47	0:07:12	0:05:47 - 0:08:36
mice_2_2	99.095	99.081	99.067 - 99.095	98.051	98.085	98.051 - 98.119	0:08:08	0:07:19	0:06:30 - 0:08:08
mice_2_3	99.959	97.571	95.140 - 99.959	99.221	97.171	95.084 - 99.221	0:04:58	0:06:00	0:04:58 - 0:07:03
mice_2_4	99.962	99.974	99.962 - 99.985	99.958	99.970	99.958 - 99.982	0:06:19	0:05:23	0:04:28 - 0:06:19
mice_4_1	99.467	99.284	99.098 - 99.467	99.445	99.169	98.891 - 99.445	0:14:27	0:12:37	0:10:45 - 0:14:27
mice_4_2	93.771	92.112	90.411 - 93.771	93.768	92.098	90.386 - 93.768	0:13:58	0:14:56	0:13:58 - 0:15:55
zebrafish_5	99.687	99.822	99.687 - 99.961	99.657	99.804	99.657 - 99.955	0:08:40	0:11:35	0:08:40 - 0:14:36
zebrafish_7	99.994	99.982	99.970 - 99.994	99.973	99.963	99.953 - 99.973	0:13:59	0:15:39	0:13:59 - 0:17:22
zebrafish_10_1	99.999	99.999	99.999 - 99.999	99.997	99.997	99.997 - 99.999	0:44:31	0:44:12	0:42:42 - 0:45:24
zebrafish_10_2	99.987	99.987	99.987 - 99.987	99.982	99.978	99.975 - 99.982	0:47:18	0:47:23	0:47:18 - 0:47:27
zebrafish_10_3	99.992	99.992	99.992 - 99.992	99.991	99.987	99.984 - 99.991	0:45:08	0:44:05	0:43:02 - 0:45:08
zebrafish_10_4	99.965	99.978	99.965 - 99.990	99.964	99.977	99.964 - 99.989	0:20:05	0:19:19	0:18:32 - 0:20:05
zebrafish_20	99.997	99.998	99.997 - 99.999	99.981	99.980	99.979 - 99.981	1:01:06	0:56:18	0:51:24 - 1:01:06
zebrafish_60_1	99.332	99.306	99.279 - 99.332	99.333	99.307	99.281 - 99.333	3:03:42	2:54:11	2:44:27 - 3:03:42
zebrafish_60_2	99.901	99.939	99.901 - 99.977	99.887	99.927	99.887 - 99.967	3:58:33	3:01:47	2:04:41 - 3:58:33
zebrafish_60_3	99.990	99.990	99.989 - 99.990	99.988	99.987	99.987 - 99.988	2:27:01	2:34:42	2:27:01 - 2:42:29
zebrafish_80_1	99.849	99.905	99.815 - 99.999	99.818	99.888	99.790 - 99.991	8:30:00	12:13:23	6:29:28 - 11:29:21
zebrafish_80_2	99.950	99.974	99.950 - 99.997	99.948	99.971	99.948 - 99.994	4:17:00	4:19:08	4:17:00 - 4:21:16
zebrafish_80_3	99.999	99.973	99.947 - 99.999	99.992	99.967	99.941 - 99.992	3:37:08	4:21:01	3:37:08 - 5:05:52
zebrafish_100_1	94.468	97.195	94.468 - 99.927	94.051	96.976	94.051 - 99.907	11:55:32	12:01:12	10:12:42 - 13:06:53
zebrafish_100_2	99.984	99.982	99.981 - 99.984	99.978	99.977	99.976 - 99.978	5:25:35	5:34:52	5:25:35 - 5:44:14
zebrafish_100_3	99.966	99.952	99.937 - 99.966	99.961	99.947	99.933 - 99.961	6:20:55	6:01:33	5:41:37 - 6:20:55

## Sheet: idtracker.ai version 5
Name	IDF1 score without crossings (%)			IDF1 score with crossings (%)			Tracking time
	Median	Mean	20-80 percentiles	Median	Mean	20-80 percentiles	Median	Mean	20-80 percentiles
drosophila_6	98.449	98.467	97.720 - 99.194	98.209	98.353	97.753 - 99.081	0:04:28	0:04:38	0:04:26 - 0:05:13
drosophila_8	99.100	99.294	99.100 - 100.000	98.779	99.032	98.769 - 99.961	0:04:46	0:04:59	0:03:39 - 0:05:14
drosophila_10	99.950	98.864	96.805 - 99.950	99.950	98.864	96.804 - 99.950	1:36:47	1:15:54	0:31:15 - 1:43:01
drosophila_38	99.997	99.987	99.993 - 99.998	99.959	99.948	99.951 - 99.977	0:30:22	0:31:29	0:23:22 - 0:37:52
drosophila_59	99.997	99.933	99.861 - 100.000	99.984	99.926	99.856 - 99.997	1:42:52	1:59:44	1:13:52 - 2:28:11
drosophila_60	100.000	99.966	99.885 - 100.000	100.000	99.954	99.825 - 100.000	1 day, 14h	1 day, 5h	3:54:48 - 1 day, 15h
drosophila_72	99.990	99.992	99.989 - 99.997	99.982	99.984	99.981 - 99.990	1:06:10	1:20:44	0:37:58 - 1:35:37
drosophila_80	99.942	99.941	99.921 - 99.960	99.838	99.835	99.816 - 99.845	2:12:26	5:01:52	1:24:11 - 3:26:08
drosophila_100_1	99.944	99.911	99.820 - 99.970	99.834	99.799	99.716 - 99.844	2:51:26	10:36:07	1:45:28 - 1 day, 2h
drosophila_100_2	98.937	98.937	one point only	98.916	98.916	one point only	1 day, 18h	1 day, 18h	1 day, 17h - 1 day, 19h
drosophila_100_3	99.833	99.818	99.720 - 99.859	99.763	99.746	99.655 - 99.786	2:43:07	7:54:35	1:39:37 - 4:09:37
mice_2_1	99.659	99.674	99.616 - 99.707	98.368	98.355	97.893 - 98.699	0:02:15	0:02:21	0:02:14 - 0:02:29
mice_2_2	99.176	99.162	99.053 - 99.179	97.881	97.968	97.687 - 97.987	0:02:50	0:02:49	0:02:34 - 0:03:01
mice_2_3	99.883	98.778	94.339 - 99.965	99.043	98.028	93.784 - 99.168	0:03:05	0:03:08	0:02:39 - 0:03:39
mice_2_4	99.937	99.934	99.937 - 99.937	99.890	99.872	99.828 - 99.895	0:02:04	0:02:07	0:01:48 - 0:02:16
mice_4_1	99.883	99.716	99.300 - 99.973	99.779	99.511	98.720 - 99.800	0:04:36	0:04:58	0:04:34 - 0:06:53
mice_4_2	93.239	93.401	93.226 - 93.891	93.189	93.327	93.185 - 93.808	0:06:46	0:08:31	0:04:37 - 0:12:06
zebrafish_5	99.999	99.998	99.994 - 99.999	99.991	99.991	99.988 - 99.991	0:01:51	0:01:49	0:01:40 - 0:01:53
zebrafish_7	99.968	99.762	99.391 - 99.992	99.940	99.745	99.379 - 99.971	0:02:29	0:03:11	0:02:22 - 0:05:05
zebrafish_10_1	100.000	100.000	100.000 - 100.000	100.000	100.000	100.000 - 100.000	0:08:50	0:08:47	0:08:32 - 0:09:09
zebrafish_10_2	100.000	99.953	99.769 - 100.000	99.995	99.947	99.757 - 99.996	0:09:24	0:09:51	0:08:48 - 0:11:48
zebrafish_10_3	100.000	99.727	100.000 - 100.000	99.997	99.729	99.996 - 99.998	0:08:54	0:09:15	0:08:32 - 0:08:54
zebrafish_10_4	100.000	99.998	99.998 - 100.000	99.999	99.997	99.996 - 99.999	0:02:52	0:02:55	0:02:50 - 0:03:10
zebrafish_20	99.998	99.996	99.988 - 99.999	99.950	99.953	99.948 - 99.966	0:08:29	0:08:37	0:07:26 - 0:10:46
zebrafish_60_1	99.999	99.999	99.999 - 100.000	99.997	99.997	99.995 - 99.998	0:21:14	0:21:34	0:20:34 - 0:24:17
zebrafish_60_2	99.989	99.947	99.973 - 99.999	99.978	99.939	99.962 - 99.996	0:37:40	0:33:21	0:20:29 - 0:43:23
zebrafish_60_3	99.983	99.982	99.968 - 99.999	99.964	99.967	99.951 - 99.995	0:31:47	0:35:34	0:30:53 - 0:40:43
zebrafish_80_1	99.999	99.993	99.999 - 100.000	99.991	99.985	99.991 - 99.992	1:00:22	1:25:46	0:47:00 - 1:22:09
zebrafish_80_2	99.989	99.985	99.961 - 99.999	99.985	99.981	99.957 - 99.995	0:30:23	0:29:18	0:27:24 - 0:30:27
zebrafish_80_3	100.000	100.000	100.000 - 100.000	99.992	99.992	99.992 - 99.995	0:30:52	0:55:01	0:27:00 - 1:29:25
zebrafish_100_1	99.998	99.994	99.983 - 99.998	99.977	99.976	99.969 - 99.978	1:46:04	1:48:59	1:30:47 - 2:09:56
zebrafish_100_2	99.998	99.988	99.954 - 99.998	99.992	99.983	99.951 - 99.995	0:45:27	0:46:28	0:43:36 - 0:56:34
zebrafish_100_3	99.999	99.988	99.942 - 100.000	99.994	99.983	99.936 - 99.995	0:59:47	1:04:01	0:56:01 - 1:43:51

## Sheet: idtracker.ai version 6
Name	IDF1 score without crossings (%)			IDF1 score with crossings (%)			Tracking time
	Median	Mean	20-80 percentiles	Median	Mean	20-80 percentiles	Median	Mean	20-80 percentiles
drosophila_6	99.991	99.955	99.802 - 99.997	99.975	99.933	99.764 - 99.976	0:02:12	0:02:15	0:02:10 - 0:02:35
drosophila_8	100.000	99.999	99.997 - 100.000	99.961	99.932	99.818 - 99.961	0:01:53	0:01:50	0:01:39 - 0:01:54
drosophila_10	99.622	99.436	99.211 - 99.911	99.622	99.435	99.212 - 99.911	0:07:28	0:07:27	0:07:21 - 0:07:33
drosophila_38	99.996	99.986	99.950 - 99.996	99.928	99.928	99.903 - 99.940	0:12:04	0:12:01	0:11:55 - 0:12:09
drosophila_59	99.929	99.900	99.916 - 99.945	99.921	99.890	99.894 - 99.941	0:18:08	0:28:40	0:16:08 - 0:33:46
drosophila_60	99.967	99.766	99.024 - 99.968	99.916	99.727	98.992 - 99.934	0:13:58	0:14:55	0:13:30 - 0:19:16
drosophila_72	99.998	99.998	99.997 - 100.000	99.992	99.992	99.989 - 99.994	0:19:44	0:19:18	0:18:45 - 0:20:03
drosophila_80	99.922	99.655	99.889 - 99.966	99.852	99.599	99.848 - 99.929	0:23:24	0:26:20	0:23:05 - 0:23:57
drosophila_100_1	99.936	99.944	99.936 - 99.948	99.864	99.879	99.860 - 99.886	0:22:58	0:22:49	0:21:07 - 0:23:37
drosophila_100_2	99.999	99.764	98.837 - 100.000	99.985	99.749	98.818 - 99.988	0:32:32	0:38:42	0:31:19 - 1:03:00
drosophila_100_3	99.379	99.441	99.079 - 99.574	99.273	99.362	99.006 - 99.510	0:27:30	0:27:24	0:26:38 - 0:27:59
mice_2_1	99.890	99.888	99.881 - 99.902	99.219	99.281	99.177 - 99.469	0:03:15	0:03:13	0:03:10 - 0:03:29
mice_2_2	99.886	99.860	99.818 - 99.922	98.680	98.546	98.408 - 98.995	0:03:11	0:03:14	0:03:09 - 0:03:35
mice_2_3	100.000	100.000	100.000 - 100.000	99.341	99.360	99.303 - 99.478	0:03:03	0:03:01	0:02:41 - 0:03:04
mice_2_4	100.000	100.000	100.000 - 100.000	99.966	99.966	99.962 - 99.971	0:02:53	0:02:51	0:02:39 - 0:03:06
mice_4_1	99.946	99.924	99.935 - 99.955	99.801	99.796	99.799 - 99.856	0:03:19	0:03:11	0:02:43 - 0:03:25
mice_4_2	99.150	99.073	98.418 - 99.907	98.913	98.970	98.445 - 99.794	0:03:33	0:03:46	0:03:19 - 0:04:58
zebrafish_5	99.999	99.999	99.998 - 99.999	99.992	99.990	99.986 - 99.995	0:01:23	0:01:23	0:01:21 - 0:01:25
zebrafish_7	99.970	99.969	99.969 - 99.971	99.945	99.944	99.944 - 99.948	0:02:02	0:02:05	0:01:56 - 0:02:13
zebrafish_10_1	100.000	100.000	99.999 - 100.000	100.000	100.000	99.999 - 100.000	0:08:37	0:08:51	0:08:32 - 0:09:22
zebrafish_10_2	100.000	100.000	100.000 - 100.000	99.996	99.995	99.996 - 99.997	0:09:47	0:09:48	0:09:40 - 0:10:03
zebrafish_10_3	100.000	100.000	99.999 - 100.000	99.998	99.998	99.997 - 99.999	0:11:32	0:11:34	0:11:11 - 0:11:38
zebrafish_10_4	99.999	99.997	99.996 - 100.000	99.995	99.995	99.994 - 99.999	0:02:08	0:02:06	0:01:58 - 0:02:09
zebrafish_20	99.999	99.997	99.999 - 99.999	99.956	99.957	99.955 - 99.966	0:03:47	0:03:42	0:03:38 - 0:03:50
zebrafish_60_1	99.982	99.989	99.982 - 99.999	99.980	99.987	99.980 - 99.997	0:20:40	0:21:17	0:20:36 - 0:22:24
zebrafish_60_2	99.989	99.984	99.949 - 99.997	99.987	99.977	99.938 - 99.989	0:24:20	0:23:31	0:23:43 - 0:24:34
zebrafish_60_3	99.999	99.988	99.946 - 99.999	99.987	99.978	99.934 - 99.988	0:26:58	0:26:57	0:26:46 - 0:27:13
zebrafish_80_1	99.999	99.999	99.998 - 99.999	99.994	99.994	99.994 - 99.994	0:29:02	0:29:48	0:28:22 - 0:30:15
zebrafish_80_2	99.989	99.990	99.978 - 99.998	99.987	99.989	99.976 - 99.997	0:29:50	0:29:31	0:28:08 - 0:31:02
zebrafish_80_3	99.997	99.980	99.989 - 99.999	99.991	99.975	99.982 - 99.992	0:29:15	0:29:32	0:28:25 - 0:30:45
zebrafish_100_1	99.993	99.991	99.983 - 99.999	99.983	99.980	99.973 - 99.986	0:42:54	0:42:59	0:42:46 - 0:44:21
zebrafish_100_2	99.955	99.965	99.955 - 99.998	99.952	99.962	99.952 - 99.995	0:37:33	0:37:31	0:35:35 - 0:37:58
zebrafish_100_3	99.988	99.979	99.987 - 99.995	99.984	99.975	99.983 - 99.990	0:36:18	0:36:34	0:36:05 - 0:37:47

## Sheet: trex
Name	IDF1 score without crossings (%)			IDF1 score with crossings (%)			Tracking time
	Median	Mean	20-80 percentiles	Median	Mean	20-80 percentiles	Median	Mean	20-80 percentiles
drosophila_6	99.943	99.921	99.859 - 99.974	99.878	99.849	99.729 - 99.964	0:26:55	0:27:12	0:21:45 - 0:32:32
drosophila_8	94.665	94.231	87.833 - 99.994	94.680	94.110	87.583 - 99.988	0:31:08	0:31:26	0:28:55 - 0:35:34
drosophila_10	97.934	98.339	97.899 - 97.940	97.936	98.340	97.901 - 97.942	0:37:17	0:37:07	0:36:32 - 0:40:18
drosophila_38	99.915	99.838	99.667 - 99.916	99.807	99.678	99.372 - 99.842	1:34:29	1:21:28	1:25:16 - 1:42:35
drosophila_59	99.862	99.364	97.554 - 99.874	99.824	99.348	97.556 - 99.873	0:52:17	0:59:37	0:22:26 - 1:27:04
drosophila_60	99.998	99.987	99.943 - 99.999	99.998	99.987	99.943 - 99.999	1:05:04	1:10:06	1:00:46 - 1:31:12
drosophila_72	97.793	96.381	91.004 - 99.971	97.789	96.374	90.994 - 99.968	1:02:38	1:16:05	0:49:20 - 1:49:13
drosophila_80	97.643	97.750	95.803 - 99.230	97.618	97.709	95.736 - 99.184	1:39:25	1:38:16	1:20:36 - 1:49:03
drosophila_100_1	99.955	97.300	92.467 - 99.959	99.954	97.280	92.430 - 99.958	2:08:46	1:47:50	0:55:32 - 2:21:53
drosophila_100_2	74.958	73.656	60.167 - 85.481	74.932	73.648	60.163 - 85.470	0:46:31	0:50:55	0:44:09 - 0:53:05
drosophila_100_3	94.200	93.859	91.874 - 96.935	94.123	93.772	91.744 - 96.836	1:02:03	1:12:59	1:01:52 - 1:19:57
mice_2_1	99.683	99.419	99.611 - 99.761	98.515	98.141	97.791 - 98.597	0:05:46	0:05:40	0:05:36 - 0:05:52
mice_2_2	99.118	98.257	95.102 - 99.550	96.376	94.821	91.215 - 96.897	0:04:06	0:04:04	0:03:22 - 0:04:29
mice_2_3	99.775	99.298	98.319 - 99.801	97.601	96.928	95.375 - 98.185	0:04:03	0:04:04	0:04:01 - 0:04:15
mice_2_4	95.925	95.708	95.793 - 96.043	95.075	94.812	94.757 - 95.463	0:02:45	0:03:25	0:02:03 - 0:05:11
mice_4_1	99.964	99.959	99.940 - 99.965	99.577	99.574	99.562 - 99.581	0:18:11	0:18:10	0:18:10 - 0:18:31
mice_4_2	93.100	92.243	92.480 - 93.523	92.680	91.795	91.818 - 93.283	0:20:34	0:18:38	0:16:13 - 0:25:05
zebrafish_5	100.000	100.000	99.999 - 100.000	100.000	100.000	99.999 - 100.000	0:09:57	0:09:48	0:09:06 - 0:10:39
zebrafish_7	99.982	99.987	99.981 - 99.998	99.981	99.985	99.979 - 99.998	0:08:37	0:09:01	0:06:41 - 0:10:16
zebrafish_10_1	99.864	99.776	99.355 - 99.890	99.852	99.770	99.347 - 99.891	0:13:57	0:13:44	0:13:30 - 0:14:43
zebrafish_10_2	99.972	99.928	99.913 - 99.993	99.968	99.924	99.907 - 99.987	0:22:07	0:21:58	0:21:03 - 0:23:23
zebrafish_10_3	99.869	99.647	99.684 - 99.998	99.861	99.639	99.666 - 99.997	0:37:51	0:31:48	0:19:06 - 0:40:01
zebrafish_10_4	99.998	99.996	99.998 - 99.998	99.996	99.994	99.995 - 99.998	0:14:12	0:14:23	0:12:36 - 0:15:16
zebrafish_20	99.942	99.872	99.717 - 99.988	99.845	99.841	99.717 - 99.959	0:43:02	0:48:17	0:36:57 - 1:03:46
zebrafish_60_1	99.887	99.920	99.873 - 99.985	99.881	99.915	99.868 - 99.981	1:43:58	1:43:05	1:34:08 - 1:46:02
zebrafish_60_2	99.541	98.755	95.295 - 99.674	99.520	98.737	95.268 - 99.657	1:30:15	1:20:09	0:42:10 - 1:35:34
zebrafish_60_3	99.229	99.357	99.091 - 99.795	99.223	99.352	99.090 - 99.790	1:39:17	1:31:10	0:59:17 - 1:45:48
zebrafish_80_1	99.655	99.696	99.628 - 99.657	99.645	99.686	99.618 - 99.646	1:23:48	1:26:36	1:20:59 - 1:35:23
zebrafish_80_2	99.689	99.686	99.595 - 99.722	99.688	99.683	99.587 - 99.720	1:38:38	1:36:16	1:26:50 - 1:40:29
zebrafish_80_3	99.789	99.650	99.719 - 99.977	99.782	99.641	99.713 - 99.972	1:36:15	1:34:10	1:24:55 - 1:36:51
zebrafish_100_1	99.565	99.052	98.559 - 99.731	99.547	99.022	98.540 - 99.703	1:36:42	1:20:06	0:59:43 - 1:57:50
zebrafish_100_2	97.988	98.334	97.751 - 99.837	97.976	98.323	97.734 - 99.832	1:06:55	1:10:49	1:04:29 - 2:02:34
zebrafish_100_3	99.293	98.675	95.432 - 99.836	99.286	98.664	95.401 - 99.833	1:15:39	1:13:24	0:22:01 - 1:42:34
